# Supplementary material for: Elucidating the role of the state of Pd in the H2-SCR of NOx by operando XANES and DRIFTS
Source: Royal Society of Chemistry journal article supplement (doi:10.1039/d4cy00574k), 2024-01-01
Supplement: d4cy00574k1.pdf [file d4cy00574k1.pdf]

**Supplementary Information for the study:  
“Elucidating the Role of the State of Pd in  
the H<sub>2</sub>-SCR of NO<sub>x</sub> by Operando XANES  
and DRIFTS”**

*Thomas J. Eldridge<sup>1,2,\*</sup>, Michael Borchers<sup>2</sup>, Patrick Lott<sup>2</sup>, Jan-Dierk Grunwaldt<sup>1,2</sup>,  
Dmitry E. Doronkin<sup>1,2,\*</sup>*

<sup>1</sup>Institute of Catalysis Research and Technology, Karlsruhe Institute of Technology,  
Eggenstein-Leopoldshafen 76344, Germany

<sup>2</sup>Institute for Chemical Technology and Polymer Chemistry, Karlsruhe Institute of  
Technology, Karlsruhe 76131, Germany

\*e-mail addresses: thomas.eldridge@kit.edu (TJE); dmitry.doronkin@kit.edu (DED)

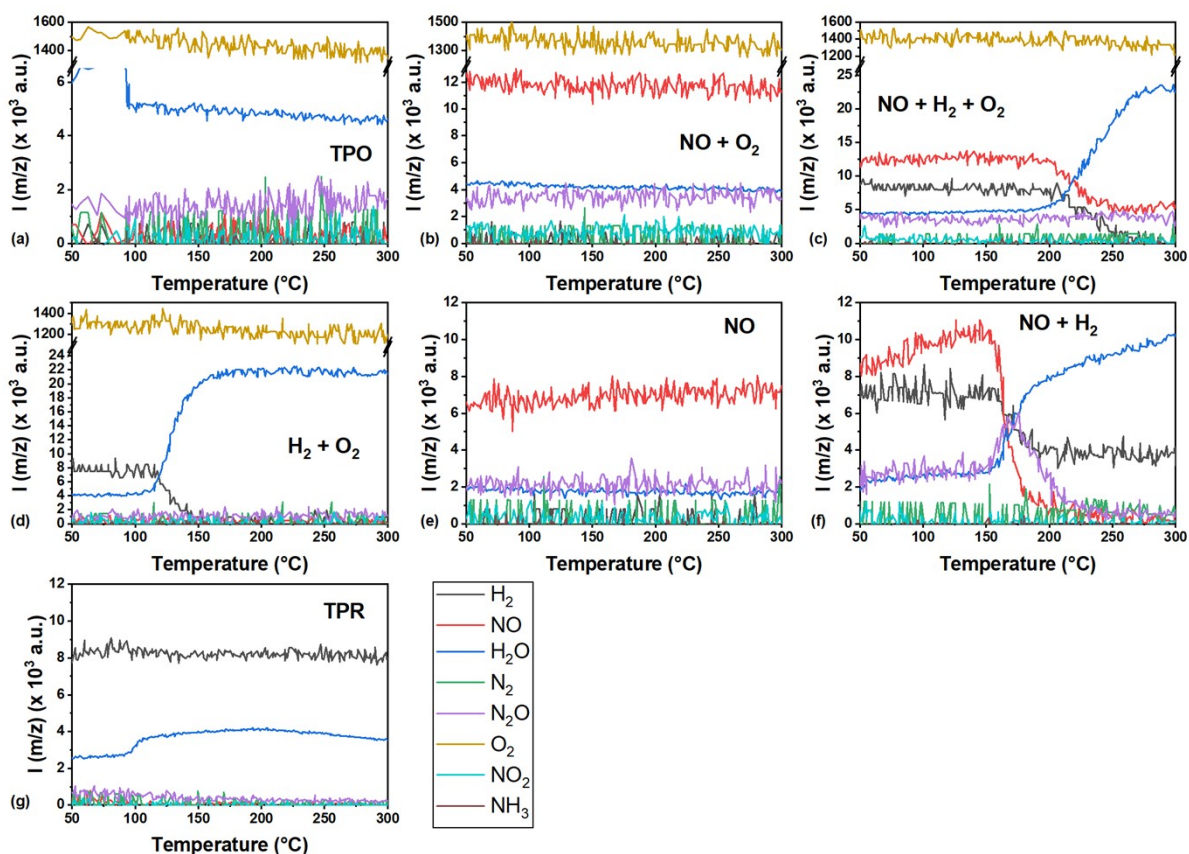

**Figure S1.** Light off curves showing H<sub>2</sub>, NO, H<sub>2</sub>O, N<sub>2</sub>, N<sub>2</sub>O, O<sub>2</sub>, NO<sub>2</sub>, and NH<sub>3</sub> (MS ion currents at  $m/z = 2, 30, 18, 28, 44, 32, 46,$  and  $15,$  respectively, normalized to the signal for He  $m/z = 4$ ) on the 1%Pd/5%V<sub>2</sub>O<sub>5</sub>/20%TiO<sub>2</sub>-Al<sub>2</sub>O<sub>3</sub> catalyst heated at 2 K/min under different gas mixtures containing 10% O<sub>2</sub>, 5000 ppm H<sub>2</sub>, and 1000 ppm NO (helium balance), presented in the order of introduction (a-g), with a 50 mL/min flow (GHSV 60,000 h<sup>-1</sup>). Gas lines were flushed in inert gas between each measurement; the catalyst was reoxidized after the NO + H<sub>2</sub> mixture and before the TPR measurement.

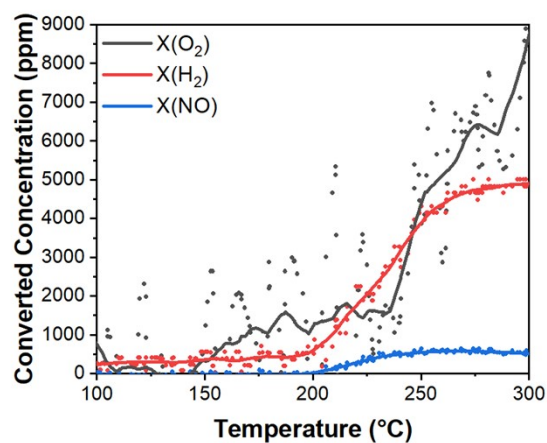

**Figure S2.** Light-off curves on 1%Pd/5%V<sub>2</sub>O<sub>5</sub>/20%TiO<sub>2</sub>-Al<sub>2</sub>O<sub>3</sub> heated at 2 K/min for the converted concentrations in ppm of H<sub>2</sub>, NO, and O<sub>2</sub> calculated from MS data at m/z = 2, 30, and 32, respectively, under a 50 mL/min flow (GHSV 60,000 h<sup>-1</sup>) of 1000 ppm NO, 5000 ppm H<sub>2</sub>, and 10% O<sub>2</sub> in He. The dots are experimental data and the solid lines are locally weighted scatterplot smoothing (LOWESS) regressions.

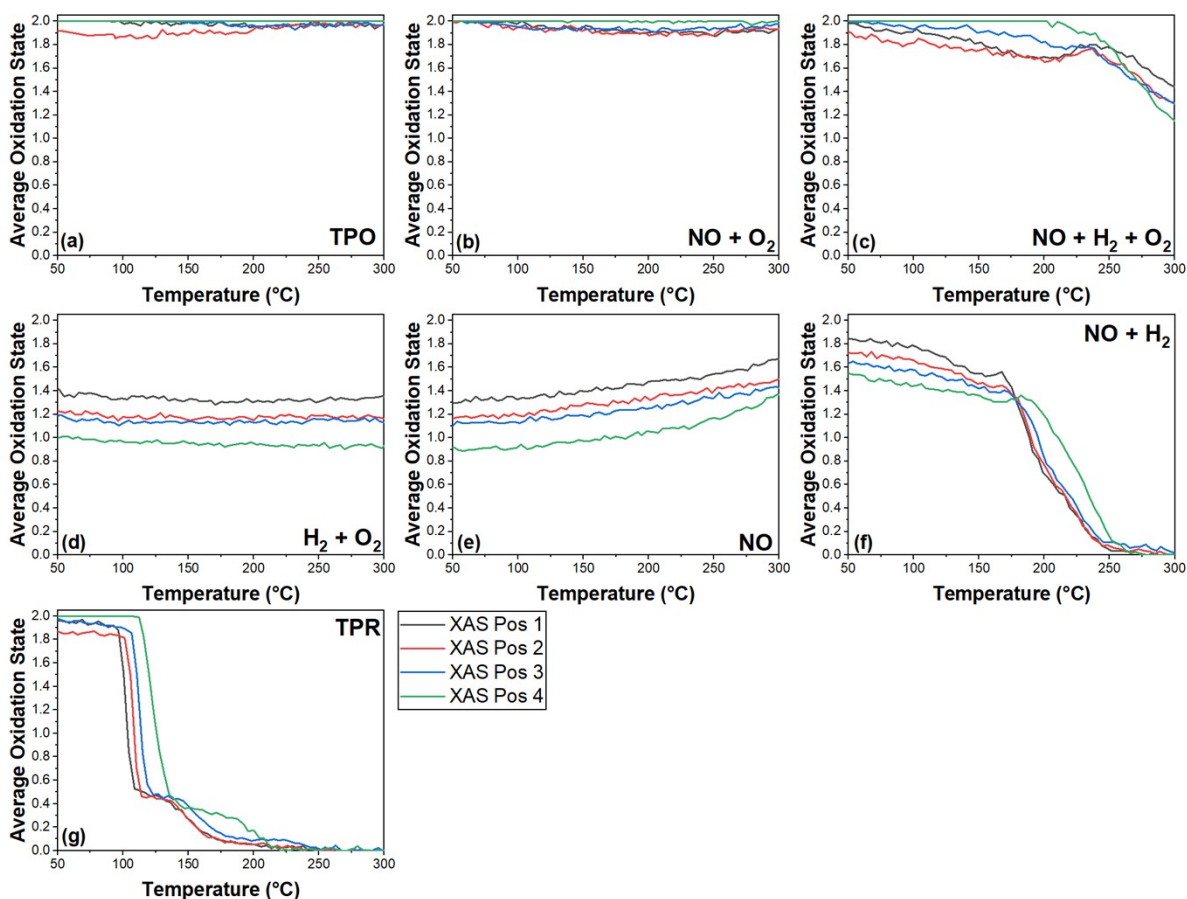

**Figure S3** Space-resolved average Pd oxidation states according to LCA of XANES spectra (solid lines) on the 1%Pd/5%V<sub>2</sub>O<sub>5</sub>/20%TiO<sub>2</sub>-Al<sub>2</sub>O<sub>3</sub> catalyst heated at 2 K/min under different gas mixtures containing 10% O<sub>2</sub>, 5000 ppm H<sub>2</sub>, and 1000 ppm NO (helium balance), presented in the order of introduction (a-g), with a 50 mL/min flow (GHSV 60,000 h<sup>-1</sup>). Gas lines were flushed in inert gas between each measurement; the catalyst was reoxidized after the NO + H<sub>2</sub> mixture and before the TPR measurement. Position 1 and 4 relate to the front and rear of the catalyst, respectively. Pt foil and PdO references were used for the LCA fits of the (a) TPO and (g) TPR measurements. LCA fits of all subsequent gas conditions.

In both the TPO (Figure S2a) and TPR (Figure S2g) gas mixtures, Pd fully oxidized and reduced, respectively, at all positions by 300 °C. With the co-adsorption of NO

and O<sub>2</sub> (Figure S2b), Pd started fully oxidized at 50 °C, following the TPO measurement, and very slightly reduced at all positions with increasing temperature, with exception to the rear of the catalyst bed which remained fully oxidized. In the mixture of O<sub>2</sub> and H<sub>2</sub> (Figure S2d), there was no significant net change in oxidation state at any probed position, despite the 40x over-stoichiometric presence of O<sub>2</sub> required for H<sub>2</sub> combustion; here the catalyst started in a slightly reduced state, because the gas lines were flushed with inert gas after the SCR mixture, but the catalyst was not fully reoxidized. In NO (Figure S2e), Pd gradually oxidized in small amounts with increasing temperature with the rear position, due to starting more reduced, oxidizing more significantly than other positions; here the starting oxidation states of Pd were retained from the O<sub>2</sub> and H<sub>2</sub> mixture. The XANES results of the NO and H<sub>2</sub> (Figure S2c) and SCR (Figure S2f) mixtures are discussed in the main text.

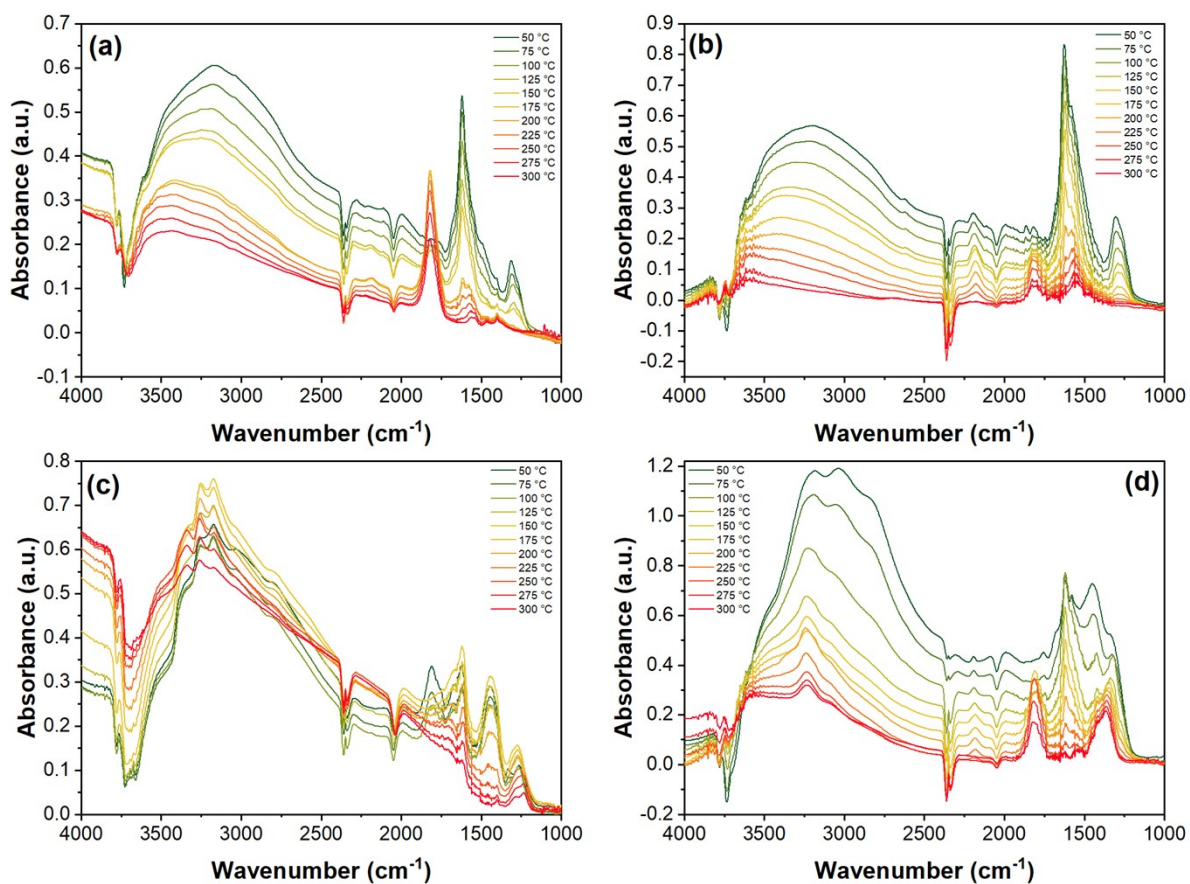

**Figure S4.** Temperature dependent DRIFTS spectra without any baseline correction of the 1%Pd/5%V<sub>2</sub>O<sub>5</sub>/20%TiO<sub>2</sub>-Al<sub>2</sub>O<sub>3</sub> catalyst under a flow of (a) 1000 ppm NO in argon, (b) 1000 ppm NO and 10% O<sub>2</sub> in Ar, (c) 1000 ppm NO and 5000 ppm H<sub>2</sub> in argon, and (d) 1000 ppm NO, 5000 ppm H<sub>2</sub>, and 10% O<sub>2</sub> in Ar.

**Table S1.** Extended X-Ray absorbance fine structure fitted parameters for the 1%Pd/5%V<sub>2</sub>O<sub>5</sub>/20%TiO<sub>2</sub>-Al<sub>2</sub>O<sub>3</sub> catalyst

| Sample          | d Pd-Pd (Å)   | Coordination Number | $\sigma^2$ (Pd) ( $10^{-3}$ Å <sup>2</sup> ) | $\delta E_0$ (eV) | $\rho$ (%) |
|-----------------|---------------|---------------------|----------------------------------------------|-------------------|------------|
| <b>Pd Foil</b>  | 2.737 ± 0.002 | 12*                 | 5.2 ± 0.3                                    | 3.4 ± 0.3         | 0.1        |
| <b>Catalyst</b> | 2.74 ± 0.02   | 8.1 ± 1.5           | 9.4                                          | -0.1 ± 2.1        | 1.2        |

\* Amplitude reduction factor determined as 0.83
